# Supplementary material
Source: Royal Society of Chemistry journal article supplement (doi:10.1039/d6nj00986g)
Supplement: d6nj00986g1.pdf [file d6nj00986g1.pdf]

## Ultrasound-Assisted Synthesis of $\text{CuMnO}_2/\text{CN}$ with Cation- $\pi$ Interactions for Enhanced Ozone Decomposition

Shengjuan Shao <sup>a\*</sup>, Jing Jing <sup>a,b</sup>, Yunfeng Zhang <sup>a</sup>, Rongqian Meng <sup>a</sup>, Fuming Miao <sup>b</sup>, Weizhou Jiao <sup>b\*</sup>

<sup>a</sup>. Department of Chemistry and Chemical Engineering, Taiyuan Institute of Technology, Taiyuan, 030008, China

<sup>b</sup>. School of Chemistry and Chemical Engineering, North University of China, Taiyuan, Shanxi 030051, China

\*Corresponding author

E-mail: [shaosj\\_tit@163.com](mailto:shaosj_tit@163.com); [zbdxjwz@nuc.edu.cn](mailto:zbdxjwz@nuc.edu.cn)

### Figures and Tables

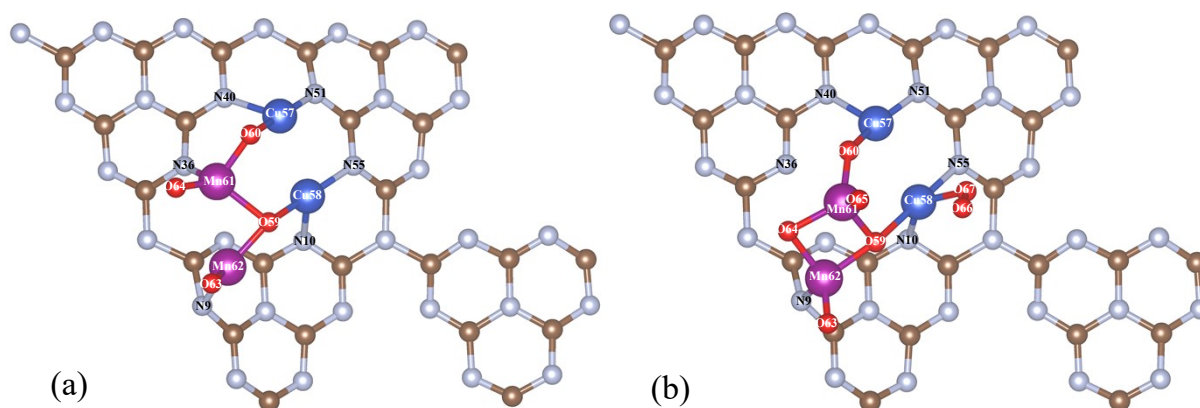

Fig. S1 Top view of the  $\text{CuMnO}_2/\text{CN}$  configuration (a) and the surface adsorption configuration of ozone on it (b)

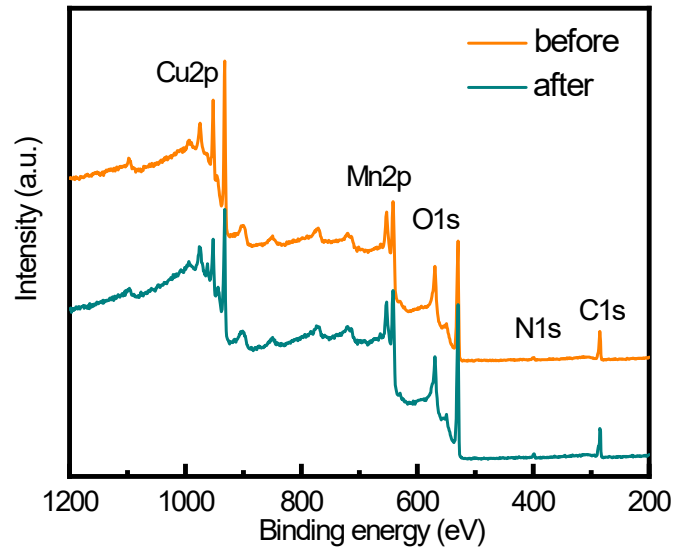

Fig. S2 XPS survey spectra of CuMnO<sub>2</sub>/CN before and after ozonation.

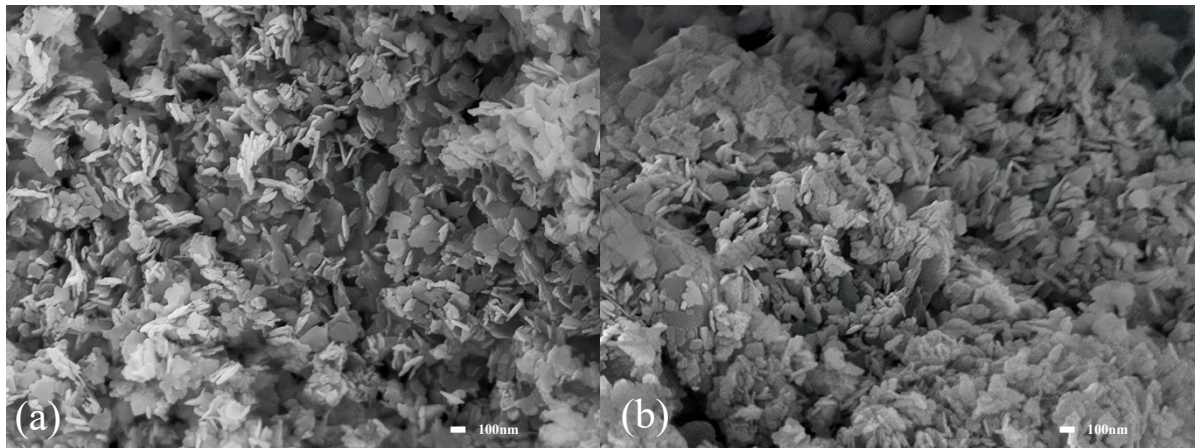

Fig. S3 SEM images of CuMnO<sub>2</sub>/CN catalysts prepared by the ultrasonic-assisted method (a) and the hydrothermal method (b).

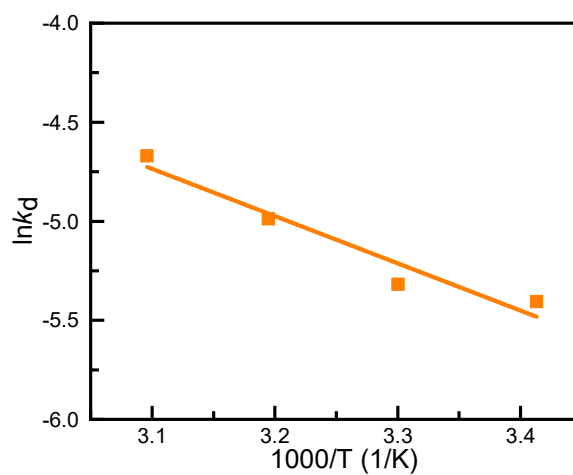

Fig. S4 Arrhenius plot for ozone decomposition catalyzed by CuMnO<sub>2</sub>/CN at pH = 7

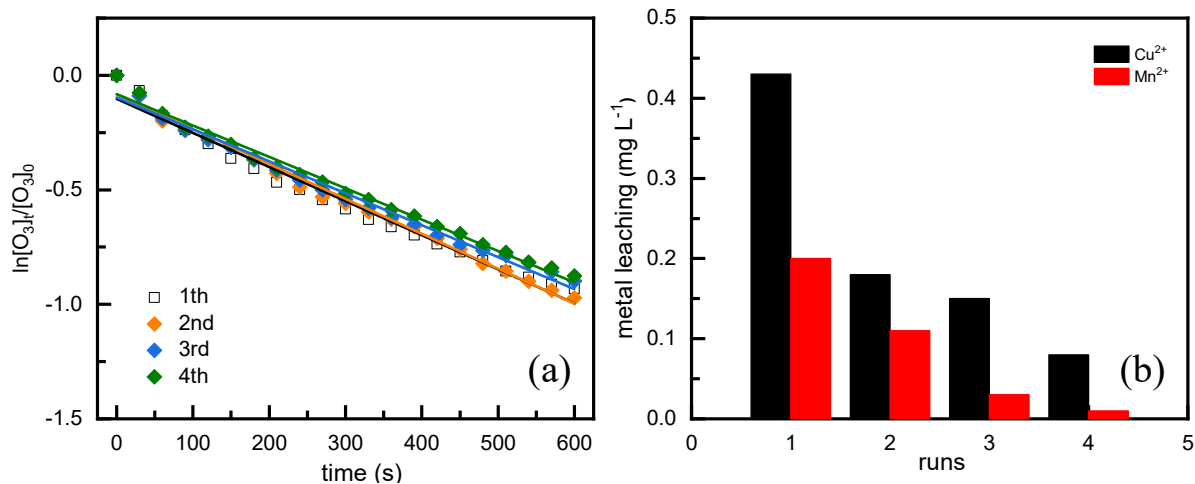

**Fig. S5 (a) The decomposition rate of ozone catalyzed by  $\text{CuMnO}_2/\text{CN}$  under recycling; (b) metal leaching in ozone decomposition catalyzed by  $\text{CuMnO}_2/\text{CN}$**

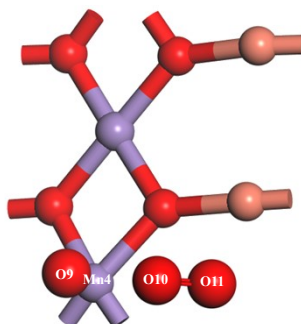

**Fig. S6  $\text{O}_3$  adsorption configurations at the Lewis acid sites of  $\text{CuMnO}_2$**

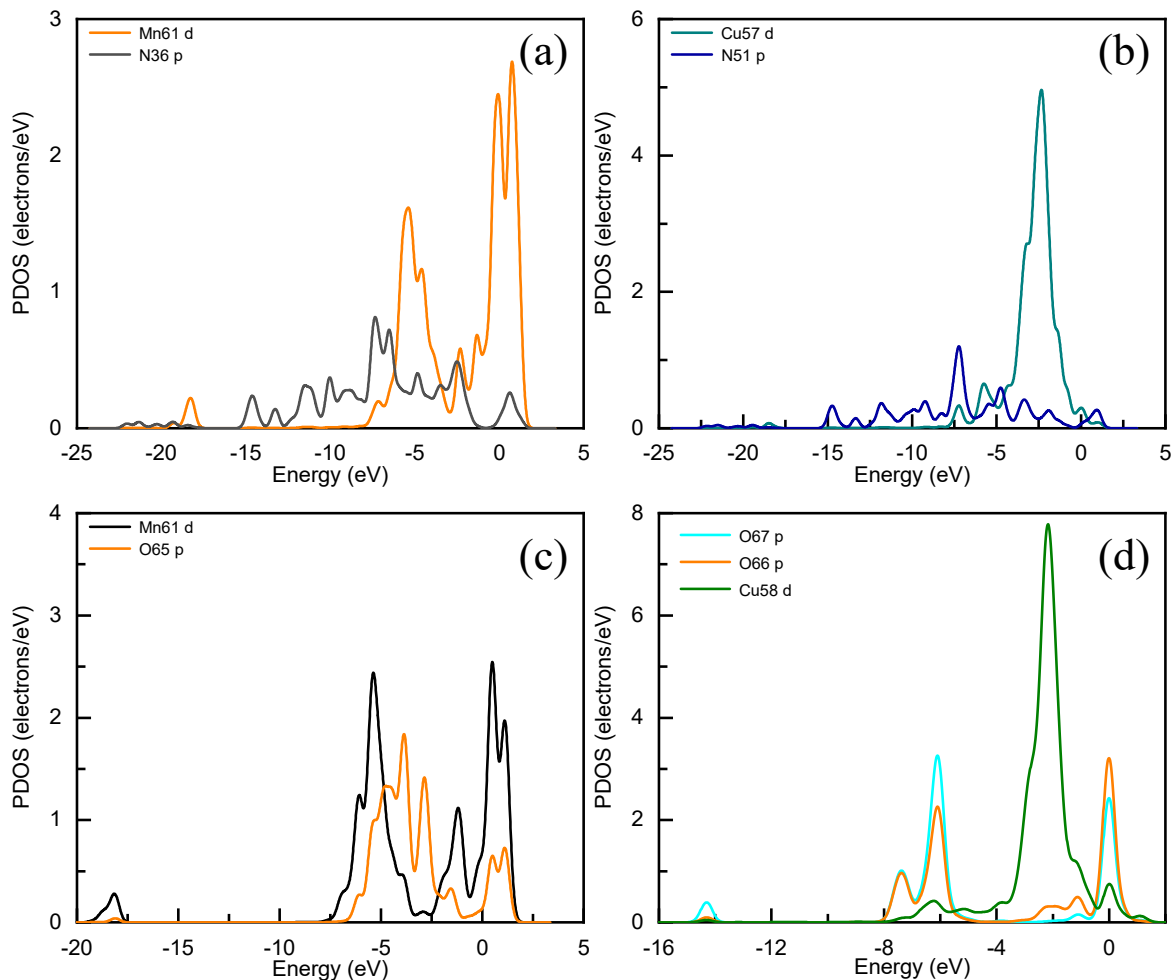

**Fig. S7 PDOS analysis of partial atoms in CuMnO<sub>2</sub>/CN before (a, b) and after (c, d) O<sub>3</sub> adsorption**

**Table S1 Ozone decomposition rate constant  $k_d$  for different catalysts.**

| catalysts                    | $k_d \cdot 10^3/s$ |
|------------------------------|--------------------|
| CuMnO <sub>2</sub> /0.96NaOH | 1.03               |
| CuMnO <sub>2</sub> /1.28NaOH | 1.17               |
| CuMnO <sub>2</sub> /1.60NaOH | 1.36               |
| CuMnO <sub>2</sub> /1.92NaOH | 0.99               |
| CuMnO <sub>2</sub> /50CN     | 1.55               |
| CuMnO <sub>2</sub> /100CN    | 0.72               |
| CuMnO <sub>2</sub> /200CN    | 1.31               |
| CuMnO <sub>2</sub> /300CN    | 1.09               |
| CuMnO <sub>2</sub> /CN/600W  | 2.45               |
| CuMnO <sub>2</sub> /CN/800W  | 1.55               |
| CuMnO <sub>2</sub> /CN/1000W | 1.39               |

---

---

CuMnO<sub>2</sub>/CN/1200W

---

1.36

---

**Table S2 BET surface area of different catalysts.**

| samples                   | Specific surface area (m <sup>2</sup> ·g <sup>-1</sup> ) |
|---------------------------|----------------------------------------------------------|
| CuMnO <sub>2</sub>        | 63.26                                                    |
| CuMnO <sub>2</sub> /50CN  | 56.73                                                    |
| CuMnO <sub>2</sub> /100CN | 47.74                                                    |
| CuMnO <sub>2</sub> /200CN | 61.52                                                    |
| CuMnO <sub>2</sub> /300CN | 50.65                                                    |

---

**Table S3 Ozone decomposition rate constant  $k_d$  at different conditions.**

| $m_s$ (mg) | T (K) | pH | $k_d \cdot 10^3/s$ |
|------------|-------|----|--------------------|
| 20         | 293   | 6  | 1.66               |
| 30         | 293   | 6  | 2.37               |
| 40         | 293   | 6  | 2.74               |
| 50         | 293   | 6  | 3.31               |
| 30         | 303   | 7  | 4.90               |
| 30         | 313   | 7  | 6.82               |
| 30         | 323   | 7  | 9.37               |
| 30         | 293   | 6  | 2.45               |
| 30         | 293   | 7  | 4.49               |
| 30         | 293   | 8  | 16.55              |

---
